# Supplementary material
Source: MDPI journal article supplement (https://www.mdpi.com/2076-3417/11/22/10875)
Supplement: s1 [file s1]

# Plasmon Resonant Two-Photon Luminescence Inducing Photosensitization and Nonlinear Optical Microscopy In Vivo by Near-Infrared Excitation of Au Nanopeanuts

Lun-Zhang Guo <sup>1,†</sup>, Cheng-Ham Wu <sup>1,†</sup>, Ming-Fong Tsai <sup>2,†</sup>, Fong-Yu Cheng <sup>3,†</sup>, Vijayakumar Shanmugam <sup>2</sup>, Zen-Uong Tsai <sup>1</sup>, Zhiming Zhang <sup>4</sup>, Tzu-Ming Liu <sup>4,\*</sup> and Chen-Sheng Yeh <sup>2,\*</sup>

nanopeanuts obtained by adding different volumes (140, 280, and 420  $\mu$ L) of HAuCl<sub>4</sub> into Au NR@Ag colloidal solutions containing CTAB and AA. Spectra 1~5 shown for each nanopeanut represent different spot sites analyzed in the Ag/Au shell.

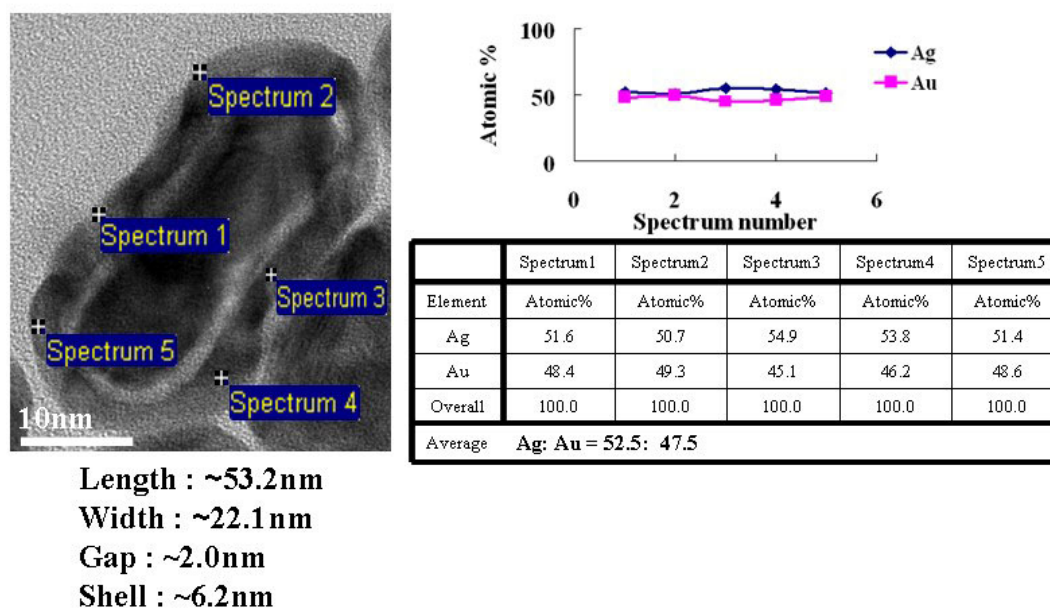

**Figure S1.** The high-resolution transmission electron microscope (HRTEM) image and energy dispersive X-ray (EDX) analysis of Au nanopeanuts. Spectra 1-5 represent different sites analyzed in the Ag/Au nanoshell. Au nanopeanuts were prepared by adding 700  $\mu$ L of HAuCl<sub>4</sub> into Au NR@Ag colloidal solution containing CTAB and AA..

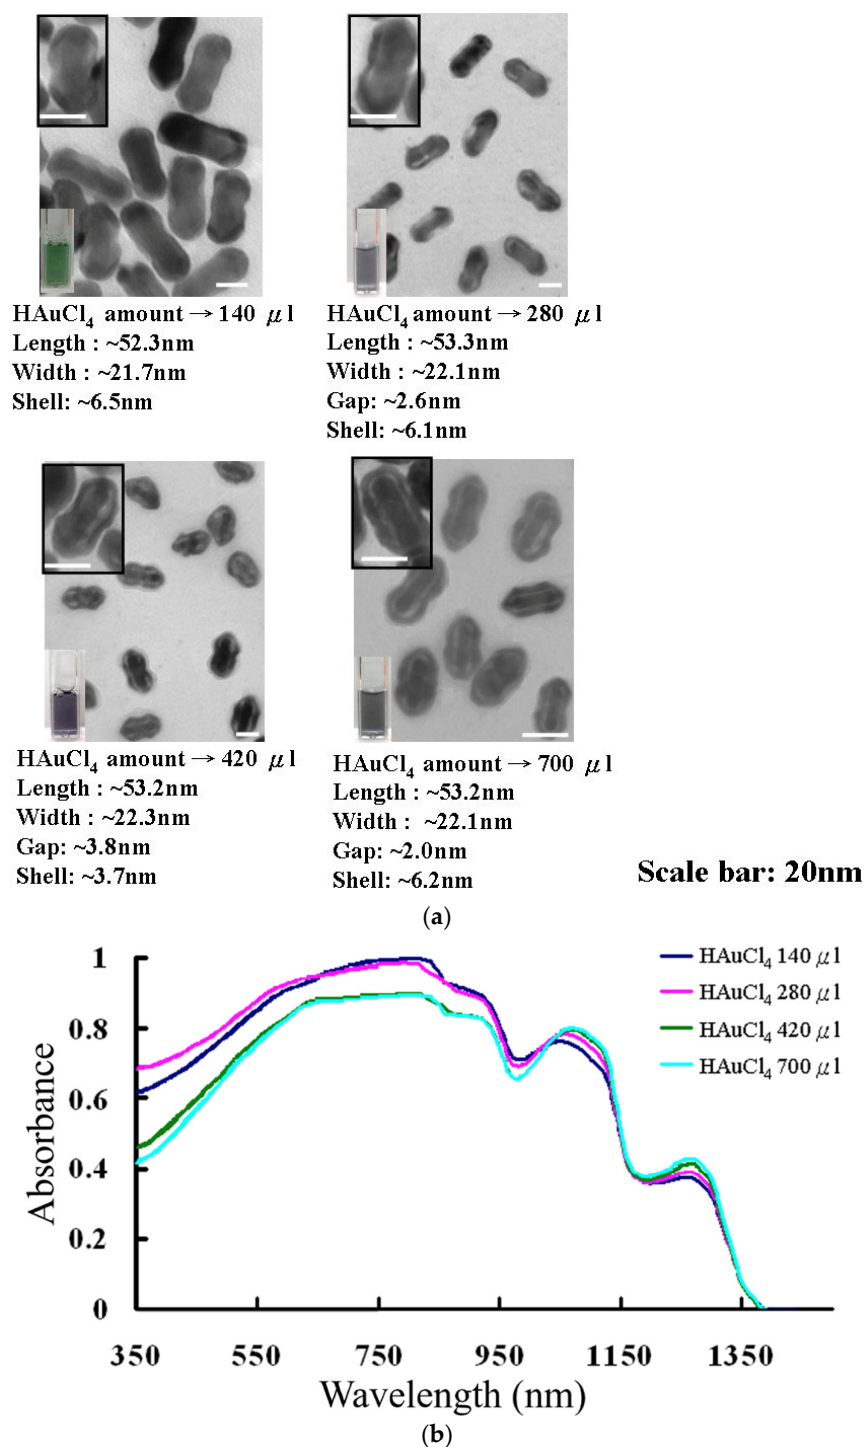

**Figure S2.** (a) TEM images and (b) UV-Vis-NIR spectra of Au nanopeanuts obtained from the addition of different volumes (140, 280, 420, and 700 μL) of HAuCl<sub>4</sub> into Au NR@Ag colloidal solutions containing CTAB and AA. Insets in each figure present the corresponding colloidal color and the amplified TEM of the single nanopeanut.

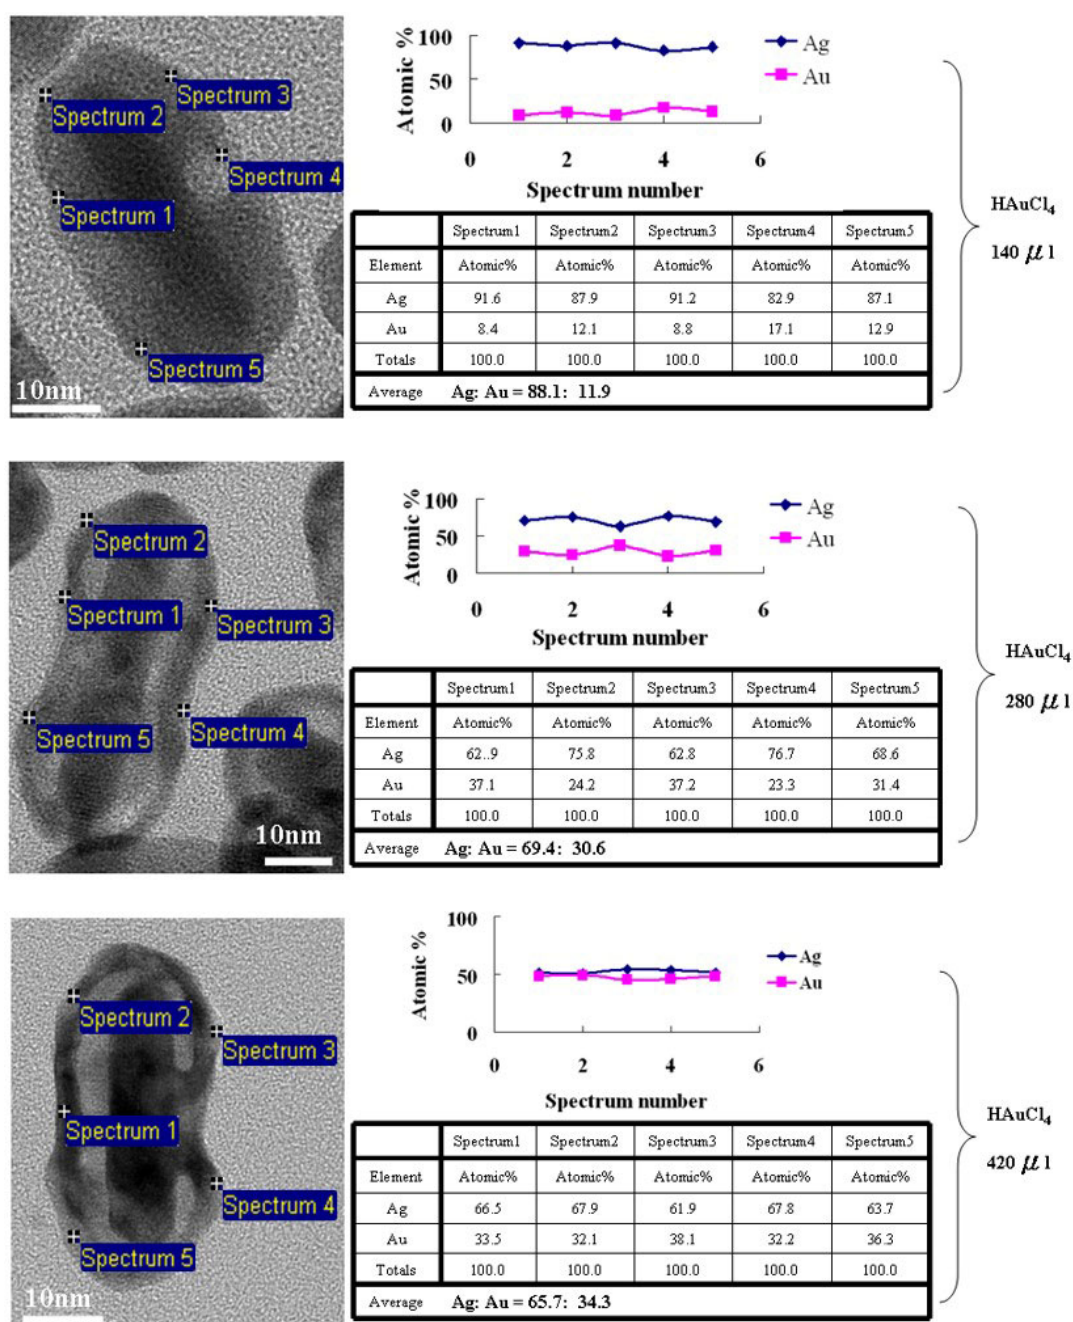

**Figure S3.** HRTEM images and EDX analysis of Au nanopanests obtained by adding different volumes (140, 280, and 420  $\mu$ L) of HAuCl<sub>4</sub> into Au NR@Ag colloidal solutions containing CTAB and AA. Spectra 1~5 shown for each nanopanest represent different spot sites analyzed in the Ag/Au shell.

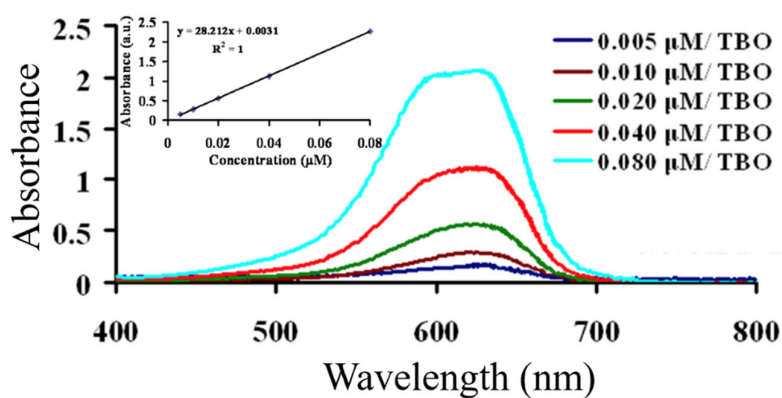

**Figure S4.** UV-Vis spectra taken as a function of TBO concentration. The inset shows the standard linear calibration curve of TBO.

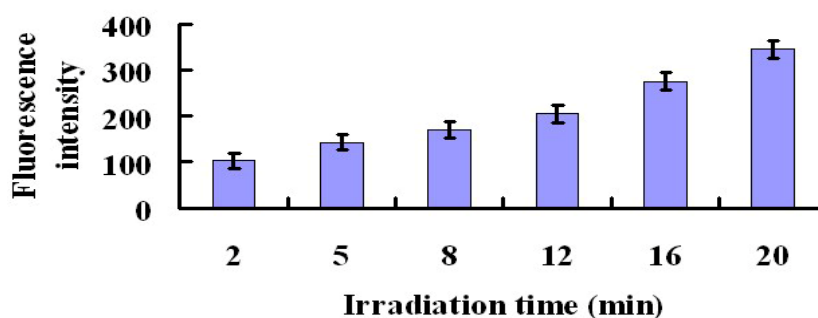

**Figure S5.** Fluorescence intensity of Singlet Oxygen Sensor Green mixed with TBO-PEGylated nanopanauts (20 μg/mL) exposed to a 633-nm (200 mW/cm<sup>2</sup>) diode laser for different irradiation times.

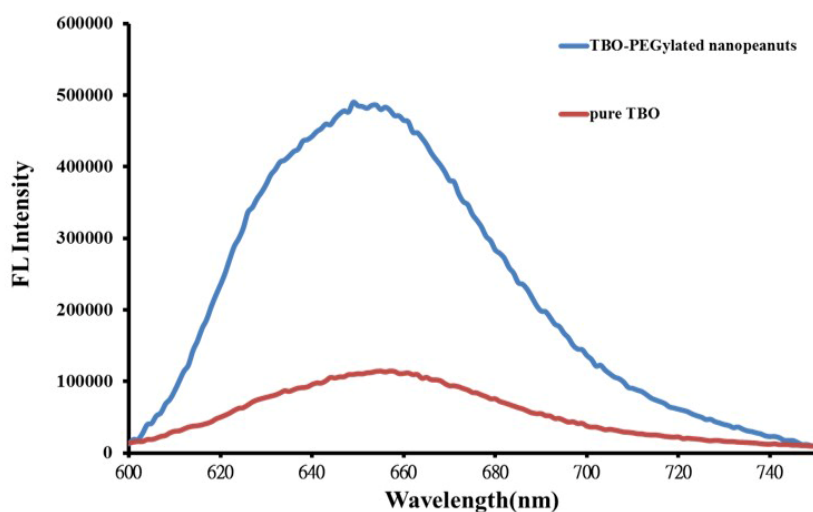

**Figure S6.** Fluorescence intensity of TBO-PEGylated nanopanauts and free TBO measured from a conventional HORIBA Fluoromax-4 spectrometer by selection of excitation wavelength 580 nm of xenon arc-lamp. The TBO concentration was fixed at 0.23 μM for both TBO-PEGylated nanopanauts and free TBO molecules

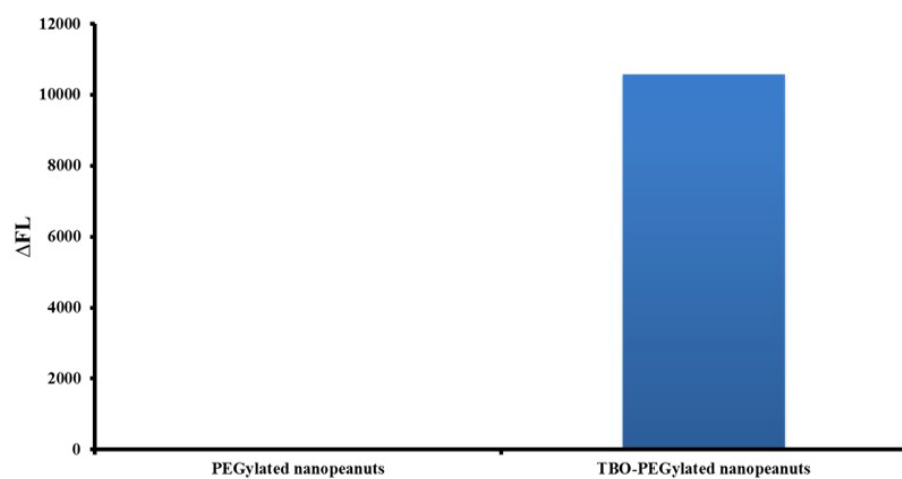

**Figure S7.** Fluorescence intensity of Singlet Oxygen Sensor Green mixed with nanopeanuts (20  $\mu\text{g/mL}$ ) exposed to 1230 nm femtosecond Cr: forsterite laser (104  $\text{mW/cm}^2$ ) for 3 min.
